# Supplementary material
Source: Springer Nature journal article supplement (https://www.springermedizin.de/resource/supplementary/12936_2012_2173_MOESM9_ESM.pdf/9542802)

Per-capita funding relative to line of equity

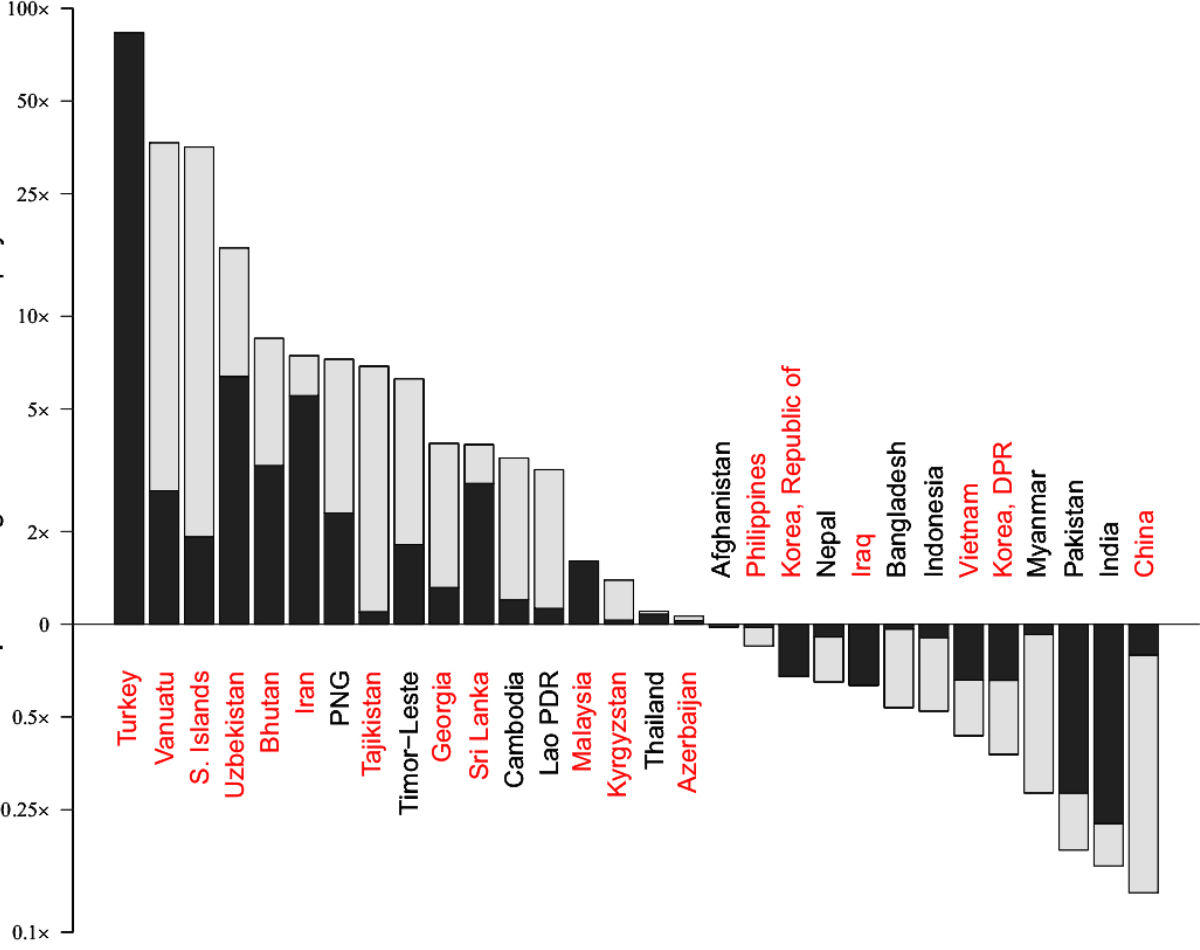

Supplement: MOESM9 [file 9542802]
